# Supplementary material for: Fibroblasts direct differentiation of human breast epithelial progenitors
Source: Springer Nature journal article supplement (doi:10.1186/s13058-020-01344-0), 2020-09-29

# Additional file Figure 1: iHBFCs express hTERT

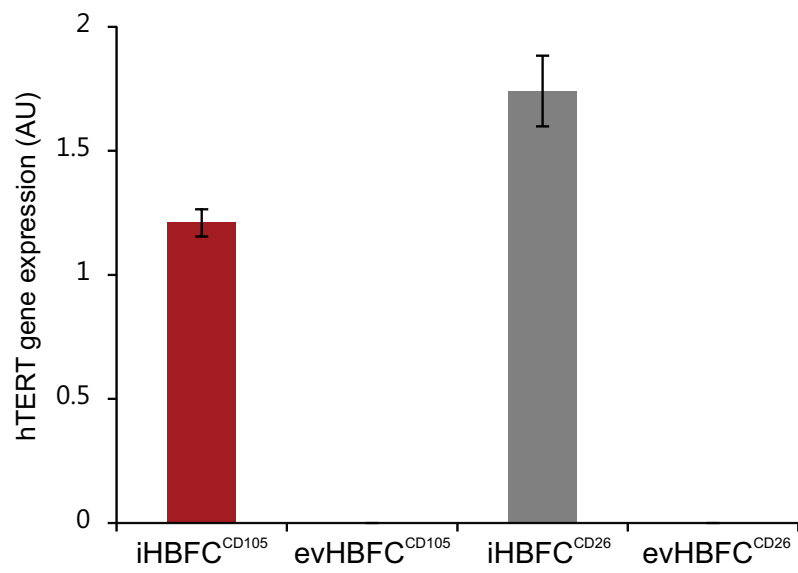

Supplement: MOESM1 [file 18429874]
