# Supplementary material for: Fibroblasts direct differentiation of human breast epithelial progenitors
Source: Springer Nature journal article supplement (doi:10.1186/s13058-020-01344-0), 2020-09-29

**Additional file Figure 2:  $iHBFC^{CD105}$  are MSC-like but lack in vivo osteogenic differentiation potential**

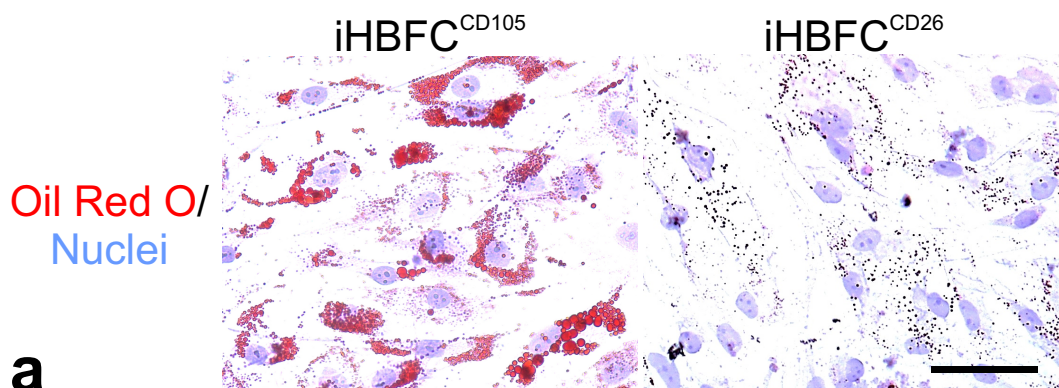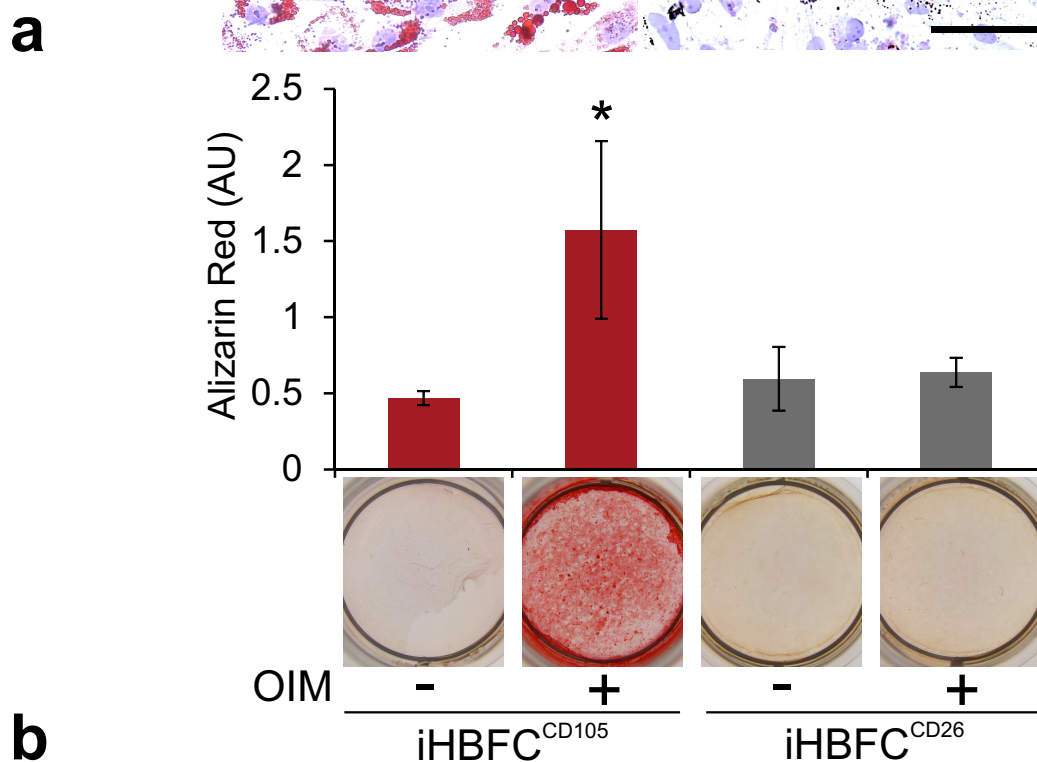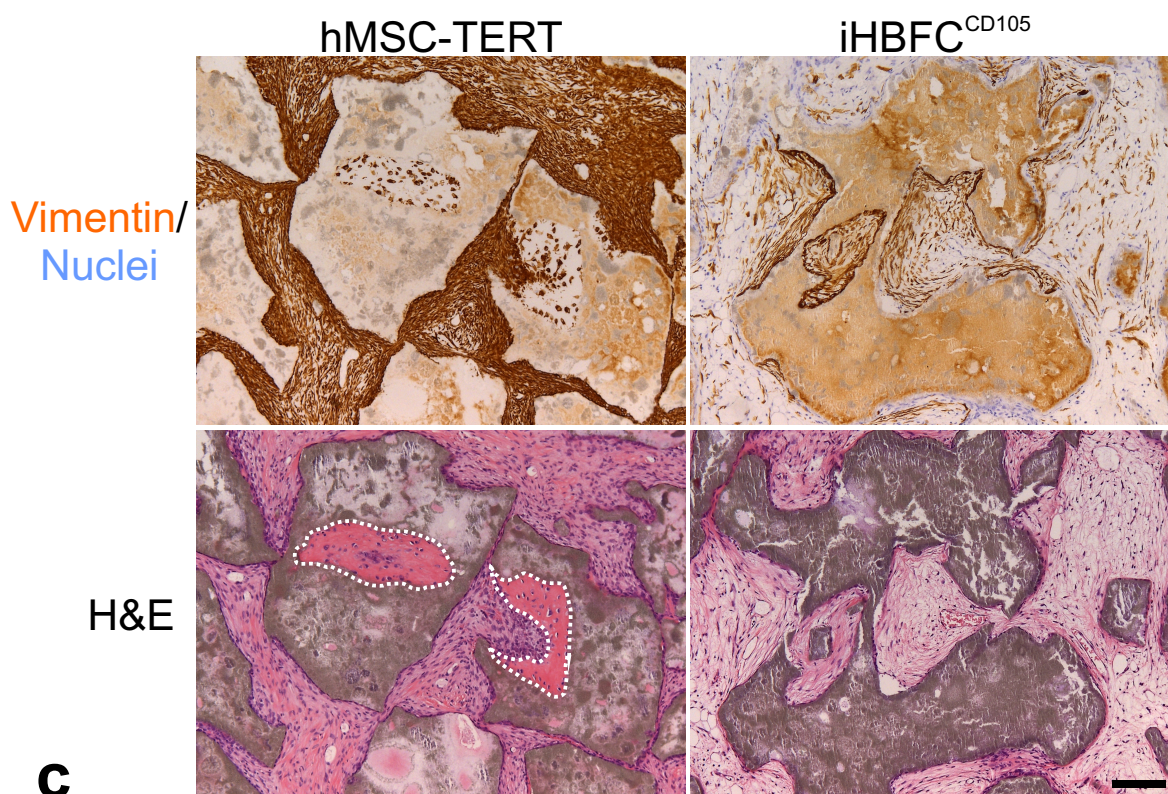

Supplement: MOESM2 [file 18429874]
