# Supplementary material for: Fibroblasts direct differentiation of human breast epithelial progenitors
Source: Springer Nature journal article supplement (doi:10.1186/s13058-020-01344-0), 2020-09-29

### Additional file Figure 3: Myoepithelial CD271 expression is higher in ducts than in TDLUs

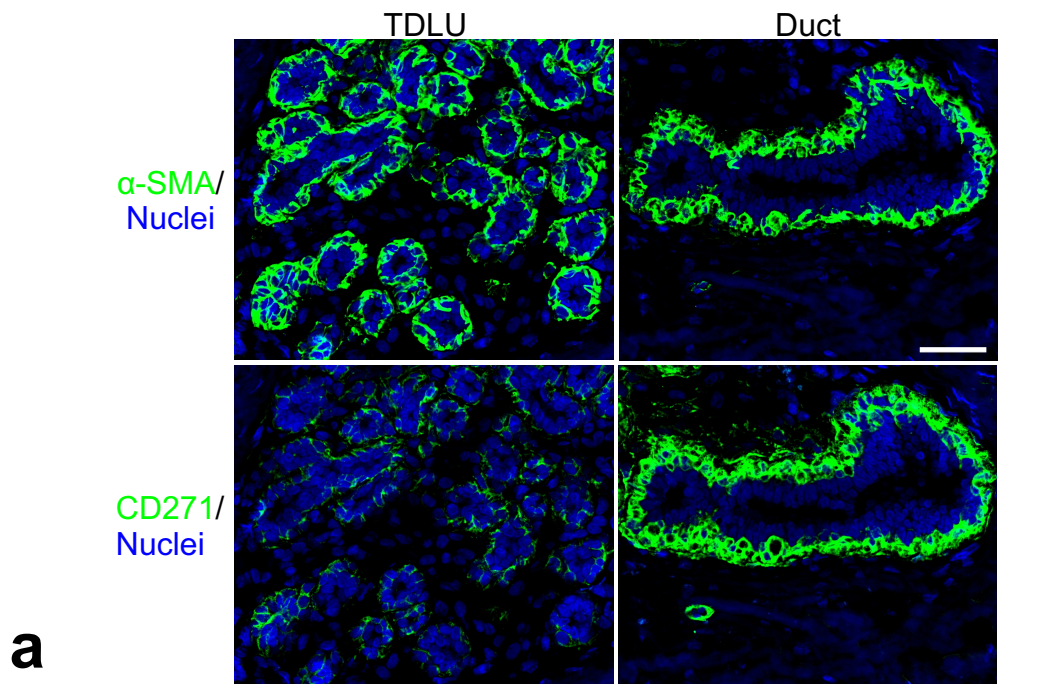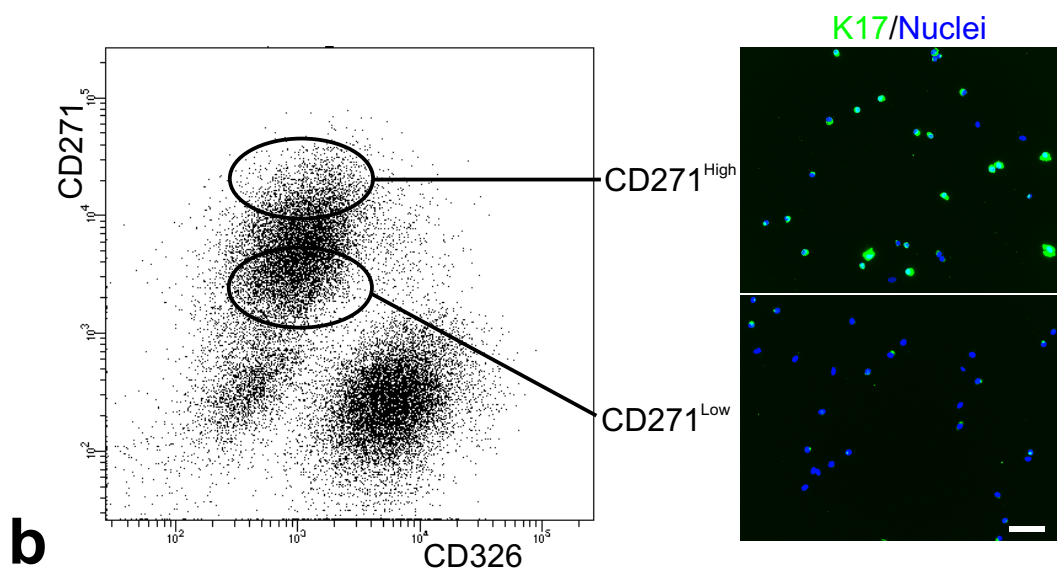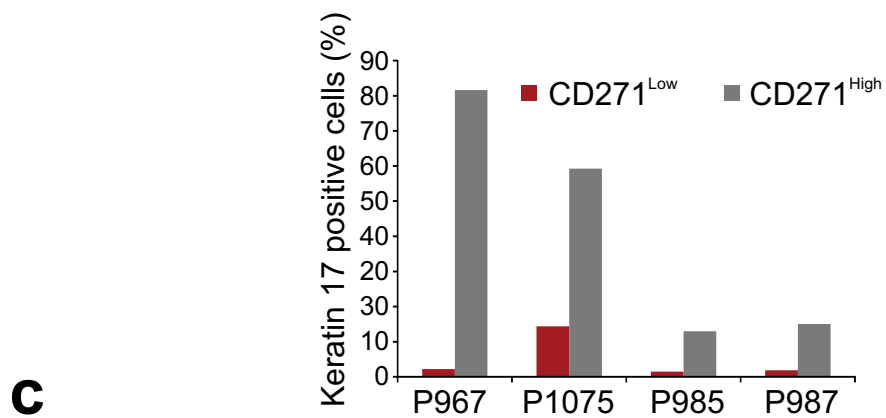

Supplement: MOESM3 [file 18429874]
